# Supplementary material for: Phenol, the simplest aromatic monohydroxy alcohol, displays a faint Debye-like process when mixed with a nonassociating liquid
Source: Royal Society of Chemistry journal article supplement (doi:10.1039/d3cp02774k), 2023-01-01
Supplement: d3cp02774k1.pdf [file d3cp02774k1.pdf]

# Phenol, the simplest aromatic monohydroxy alcohol, displays a faint Debye-like process when mixed with a nonassociating liquid

## Electronic Supplementary Information

Lars Hoffmann, Joachim Beerwerth, Kevin Moch and Roland Böhmer

Fakultät Physik, Technische Universität Dortmund, 44221 Dortmund, Germany

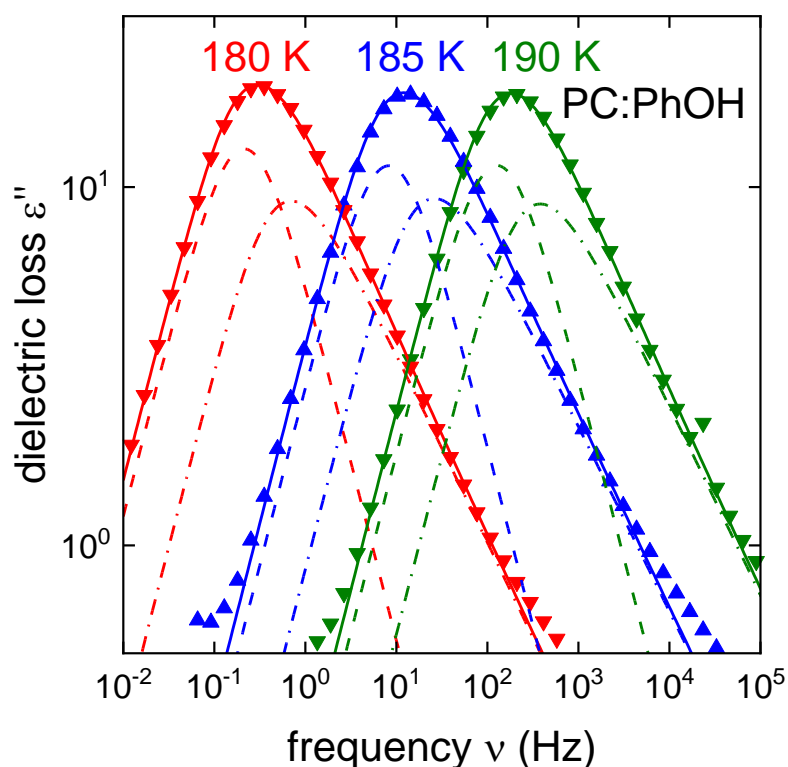

**Figure S1:** Dielectric loss spectra measured for PC:PhOH. The experimental data (symbols) are decomposed into a Debye-like peak ( $\chi_{CD,D} = 1$ ), represented by the dashed lines, and an  $\alpha$ -type contribution ( $\chi_{CD,\alpha} \approx 0.5$ ), marked by the dash-dotted lines. The solid lines which illustrate the sum of the two processes describe the experimental data well. The decomposition referring to 180 K is shown also in [Figure 2](#) of the main article.

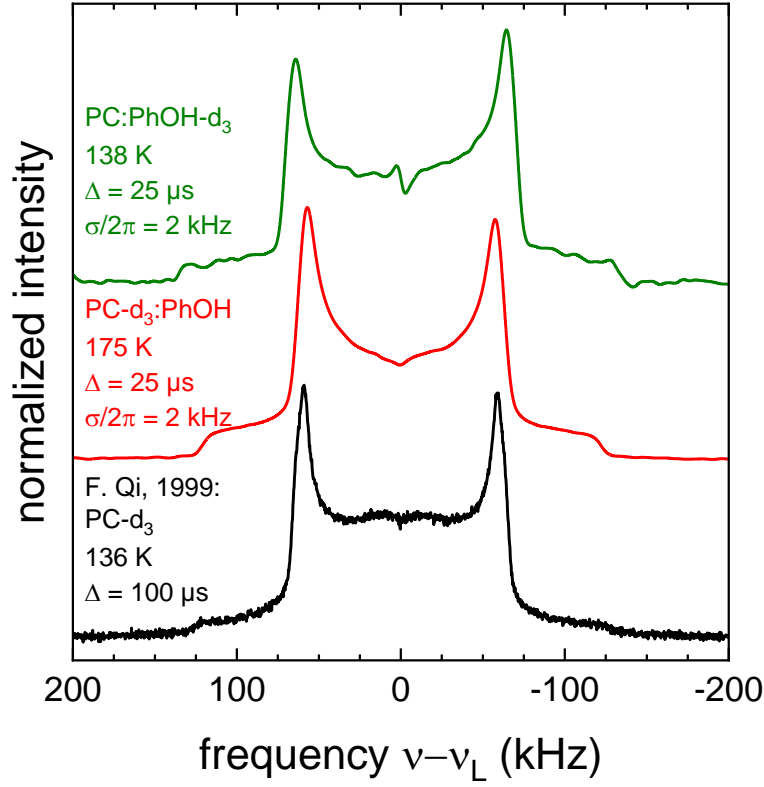

**Figure S2:** Comparison of low-temperature deuteron solid-echo spectra measured for PC:PhOH-d<sub>3</sub>, PC-d<sub>3</sub>:PhOH, and PC-d<sub>3</sub>.<sup>S1</sup> All spectra are normalized to their peak intensity. The spectral separation of the outer edge singularities is given by  $2\delta_Q$  with  $\delta_Q = 3e^2qQ / (4h)$  and the asymmetry parameter  $\eta$  can be inferred from the separation  $\Delta\nu = (1 - \eta_Q)\delta_Q$  of the horns.<sup>S2</sup> The pulse separation  $\Delta$  and the Gaussian apodization  $\sigma/2\pi$  used for each spectrum is given in the figure.

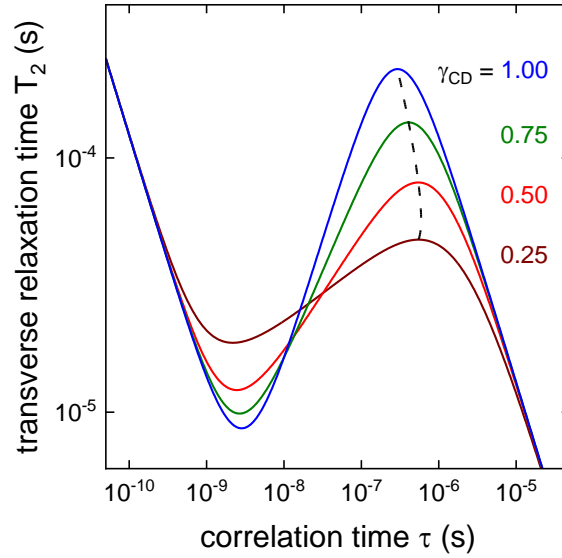

**Figure S3:** Transverse dephasing times involving contributions from first-and second order quadrupolar relaxation for different Cole-Davidson parameters  $\gamma_{CD}$ . The solid lines are calculated using eqns (13) and (14) of the manuscript for  $\omega_0 = 2\pi \times 54.2$  MHz,  $C_Q = 8.6$  MHz, and  $\eta_0 = 0.7$ . The dashed line highlights the shift of the  $T_2$  maximum when varying the Cole-Davidson parameter.

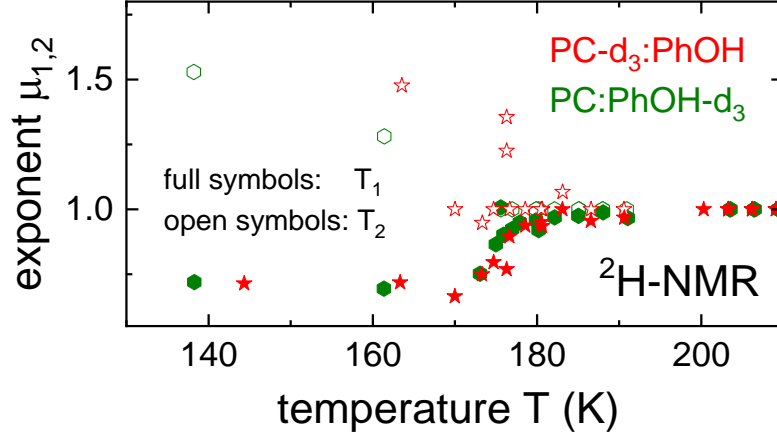

**Figure S4:** Kohlrausch exponents  $\mu_1$  and  $\mu_2$  describing the measured deuteron magnetization curves. Above  $T = 200$  K the parameters are set to  $\mu_1 = \mu_2 = 1$ . The observed low-temperature effects are similar to those seen for  $^{17}\text{O}$  NMR in the inset of [Figure 5](#). Significant deviations of the deuteron exponents from 1 are only seen below 175 K, while the oxygen magnetization turns nonexponential already below 200 K. This difference can be rationalized by noting that because  $T_{1\text{H}} \gg T_{1\text{O}}$ , ergodicity can be restored when  $\tau$  is longer (before it crosses  $T_1$ ).

**Table S1:** Vogel-Fulcher parameters used to calculate the solid lines in the Arrhenius plot ([Figure 11](#)) and for the presentation of the computed spin relaxation times (taking into account also the quadrupolar couplings, asymmetry parameters, and Cole-Davidson parameters) in [Figure 6](#). The entries in the second line provides the Vogel-Fulcher data for the time scales from stimulated echo experiments with an evolution time of 5  $\mu\text{s}$  combined with the correlation times derived from the longitudinal relaxation times. Note that the Vogel-Fulcher parameters in the last line are given already in the main text. Here, they are reproduced to facilitate a comparison with the parameters describing the NMR data.

|                         | $T_0$         | $B$              | $\log_{10}(\tau_0 / \text{s})$ | used for<br>Figure | described quantity                          |
|-------------------------|---------------|------------------|--------------------------------|--------------------|---------------------------------------------|
| PC-d <sub>3</sub> :PhOH | $156 \pm 2$ K | $680 \pm 20$ K   | $-12.9 \pm 0.3$                | 6, 11              | $T_1$ , $T_2$ and $\tau$ determined thereof |
| PC-d <sub>3</sub> :PhOH | $150 \pm 1$ K | $800 \pm 20$ K   | $-13.2 \pm 0.1$                | 11                 | $\tau_{\text{T1}}$ and $\tau_{\text{STE}}$  |
| PC:PhOH-d <sub>3</sub>  | $160 \pm 2$ K | $620 \pm 25$ K   | $-12.5 \pm 0.3$                | 6, 11              | $T_1$ , $T_2$ and $\tau$ determined thereof |
| PC:Ph <sup>17</sup> OH  | $161 \pm 3$ K | $610 \pm 25$ K   | $-12.3 \pm 1.0$                | 5, 6, 11           | $T_1$ , $T_2$ and $\tau$ determined thereof |
| PC:PhOH                 | $140 \pm 3$ K | $1300 \pm 100$ K | $-13.2 \pm 0.4$                | 11                 | $\tau_{\text{diel}}$ (dominant relaxation)  |

## Details regarding the density functional calculations

Below, the lattice parameters, cell angles, and cell volumes that were experimentally obtained using X-ray diffraction (XRD) at ambient pressure <sup>S3,S4,S5</sup> and at 0.16 GPa<sup>S6</sup> are compared with the CASTEP calculations from ref. <sup>S6</sup> and with those from the present work.

For  $p = 0$ , after in the present work we performed a geometry optimization, the energy per atom was converged to better than  $7 \times 10^{-7}$  eV, the forces to below  $2.1 \times 10^{-2}$  eV/Å, and the positions to below  $1 \times 10^{-3}$  Å. The structural data from the XRD experiments at  $T > 0$  indicate cell constants larger than those that we obtained after geometry optimization. Note that our calculations basically correspond to zero temperature.

For  $p = 0.16$  GPa the energy per atom converged to better than  $4.2 \times 10^{-6}$  eV, the forces to below  $2.0 \times 10^{-2}$  eV/Å, and the positions to below  $1 \times 10^{-3}$  Å; furthermore, the maximum stress component was below 47 MPa.

### Ambient-pressure phase

| $a$ (Å)  | $b$ (Å)  | $c$ (Å)   | $\gamma$ (°) | $V$ (Å <sup>3</sup> ) | method                     | reference     |
|----------|----------|-----------|--------------|-----------------------|----------------------------|---------------|
| 5.961    | 8.878    | 14.392    | 90.169       | 761.60                | CASTEP                     | this work     |
| 6.050(1) | 8.925(2) | 14.594(3) | 90.36(2)     | 788.0(3)              | XRD at 123 K               | <sup>S5</sup> |
| 5.97     | 9.00     | 15.10     | 90.0         | 811.3                 | XRD at 262 K               | <sup>S3</sup> |
| 6.02     | 9.04     | 15.18     | 90           | 826                   | XRD at ambient temperature | <sup>S4</sup> |
| 6.236    | 9.071    | 14.756    | 90.136       | 834.70                | CASTEP                     | <sup>S6</sup> |

### High-pressure phase

| $a$ (Å)   | $b$ (Å)    | $c$ (Å)   | $\beta$ (°) | $V$ (Å <sup>3</sup> ) | method       | reference     |
|-----------|------------|-----------|-------------|-----------------------|--------------|---------------|
| 11.213    | 5.322      | 12.185    | 102.057     | 711.11                | CASTEP       | this work     |
| 11.610(4) | 5.4416(11) | 12.217(5) | 101.47(3)   | 756.4(4)              | XRD at 293 K | <sup>S6</sup> |
| 11.728    | 5.560      | 12.332    | 100.496     | 790.69                | CASTEP       | <sup>S6</sup> |

For the ambient pressure phase, the accuracy of the present electrical field gradient parameters  $C_Q$  and  $\eta$  (obtained after geometry optimization) were checked by comparison with the data from Ref. <sup>S7</sup>. Those calculations were reported with reference to the crystallographic data from Ref. <sup>S3</sup>. Upon compression the quadrupolar coupling constants (averaged over all lattice sites) obviously change by about 10%.

| pressure  | 0 GPa         |        | 0 GPa       |        | 0.16 GPa    |        |
|-----------|---------------|--------|-------------|--------|-------------|--------|
| Site      | $C_Q$ (MHz)   | $\eta$ | $C_Q$ (MHz) | $\eta$ | $C_Q$ (MHz) | $\eta$ |
| O(1)      | -8.691        | 0.85   | -8.624      | 0.79   | -8.979      | 0.967  |
| O(2)      | -8.661        | 0.83   | -8.667      | 0.82   | -9.009      | 0.965  |
| O(3)      | -8.706        | 0.83   | -8.705      | 0.85   | -9.012      | 0.959  |
| average   | -8.686        | 0.84   | -8.665      | 0.82   | -9.000      | 0.959  |
| reference | <sup>S7</sup> |        | this work   |        | this work   |        |

## References

- <sup>S1</sup> Fei Qi, Diploma Thesis, Johannes Gutenberg-Universität, Mainz, 1999; F. Qi, K. U. Schug, S. Dupont, A. Döb, R. Böhmer and H. Sillescu, Structural relaxation of the fragile glass-former propylene carbonate studied by nuclear magnetic resonance, *J. Chem. Phys.*, 2000, **112**, 9455.
- <sup>S2</sup> U. Haeberlen, High Resolution NMR in Solids: Selective Averaging, *Advances in Magnetic Resonance*, Academic Press, New York, 1976.
- <sup>S3</sup> C. Scheringer, Die Kristallstruktur des Phenols, *Z. Kristallogr.*, 1963, **119**, 273.
- <sup>S4</sup> H. Gillier-Pandraud, Structure cristalline du phenol, *Bull. Soc. Chim.*, 1967, **6**, 1988.
- <sup>S5</sup> V. E. Zavodnik, V. K. Bel'skii and P. M. Zorkii, Crystal structure of phenol at 123 °K, *J. Struct. Chem.*, 1988, **28**, 793.
- <sup>S6</sup> D. R. Allan, S. J. Clark, A. Dawson, P. A. McGregor and S. Parsons, Pressure-induced polymorphism in phenol, *Acta Cryst. B*, 2002, **58**, 1018.
- <sup>S7</sup> V. K. Michaelis, B. Corzilius, A. A. Smith and R. G. Griffin, Dynamic nuclear polarization of <sup>17</sup>O: Direct polarization, *J. Phys. Chem. B*, 2013, **117**, 14894.
